# Supplementary material for: Qing-Kai-Ling oral liquid alleviated pneumonia via regulation of intestinal flora and metabolites in rats
Source: Frontiers journal article supplement (doi:10.3389/fmicb.2023.1194401), 2023-06-09
Supplement: Data_Sheet_1.PDF [file Data_Sheet_1.PDF]

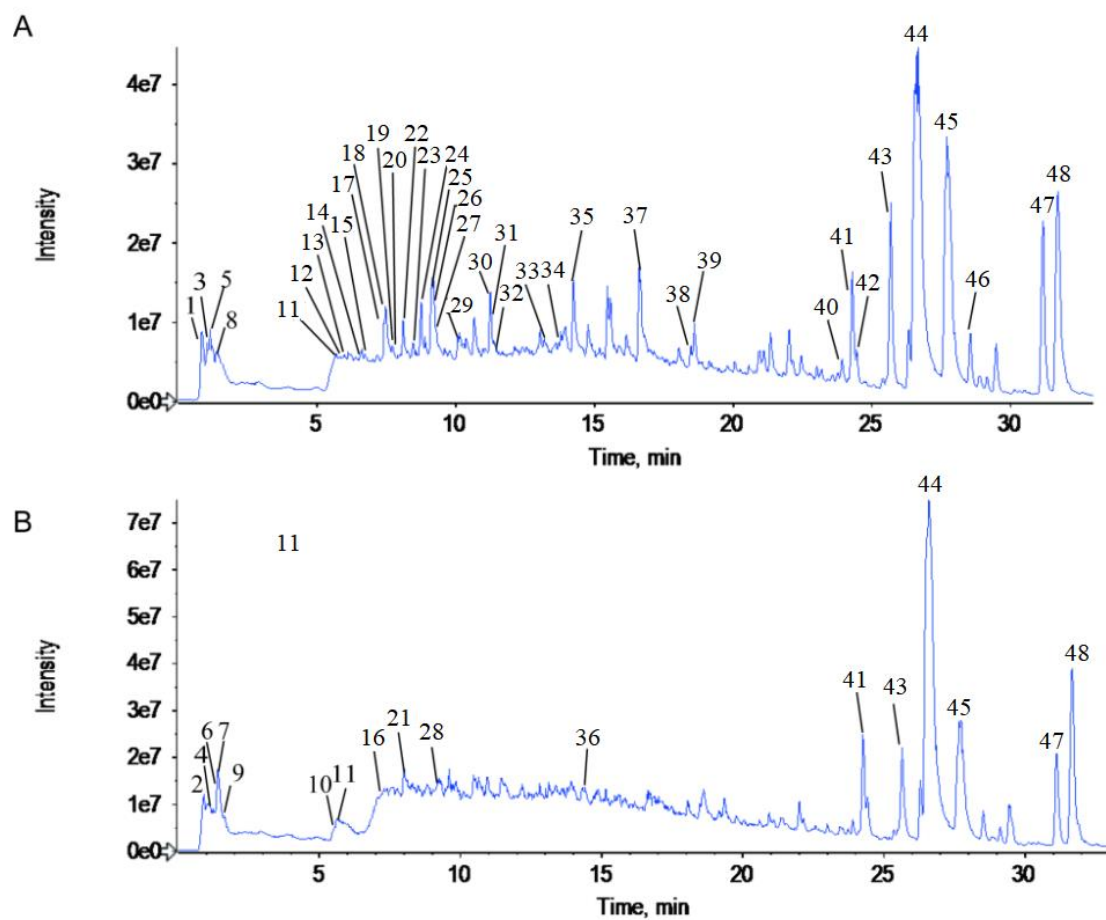

### Supplementary Figure 1

Fig. 1. Total ion chromatogram (TIC) of Qing-Kai-Ling oral liquid in ESI- (A) ion and mode ESI+ (B), respectively.

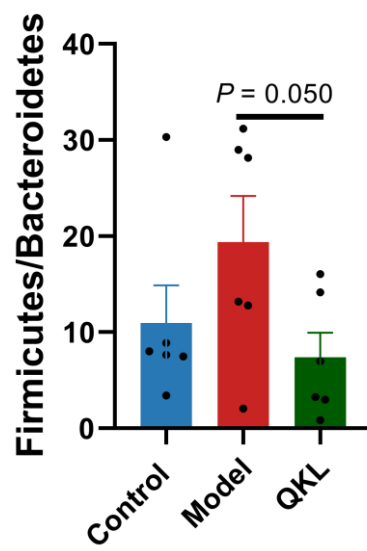

**Supplementary Figure 2**  
Ratio of Firmicutes/Bacteroidetes.

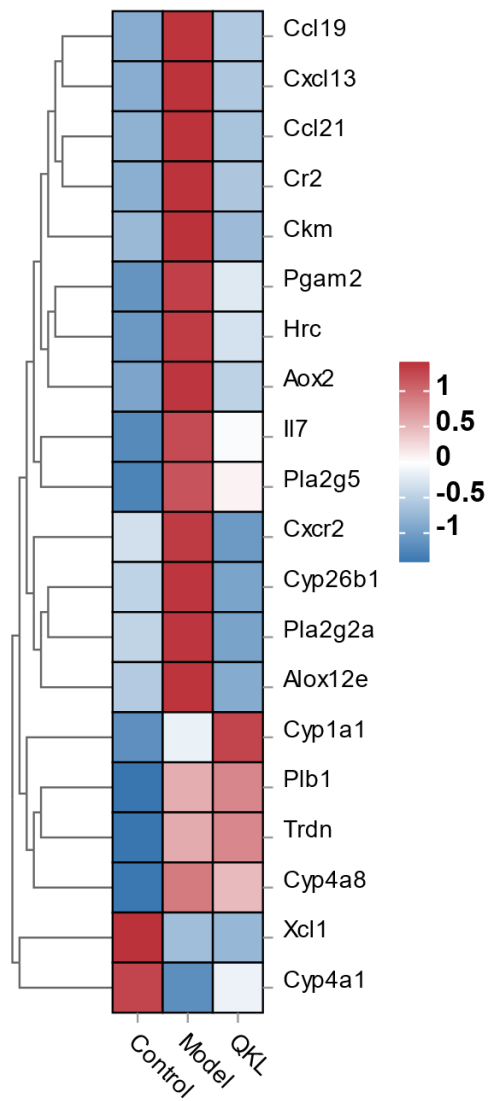

### Supplementary Figure 3

Heat map of relative abundance of 20 core genes.
